# Supplementary material
Source: MDPI journal article supplement (https://www.mdpi.com/1424-2818/12/7/262)
Supplement: s1 [file s1]

## **Supplemental Information**

**Title:** Is the distribution of two rare *Orchis* sister species limited by their main mycobiont?

**Authors:** Calevo J., Voyron S., Ercole E., Girlanda M.

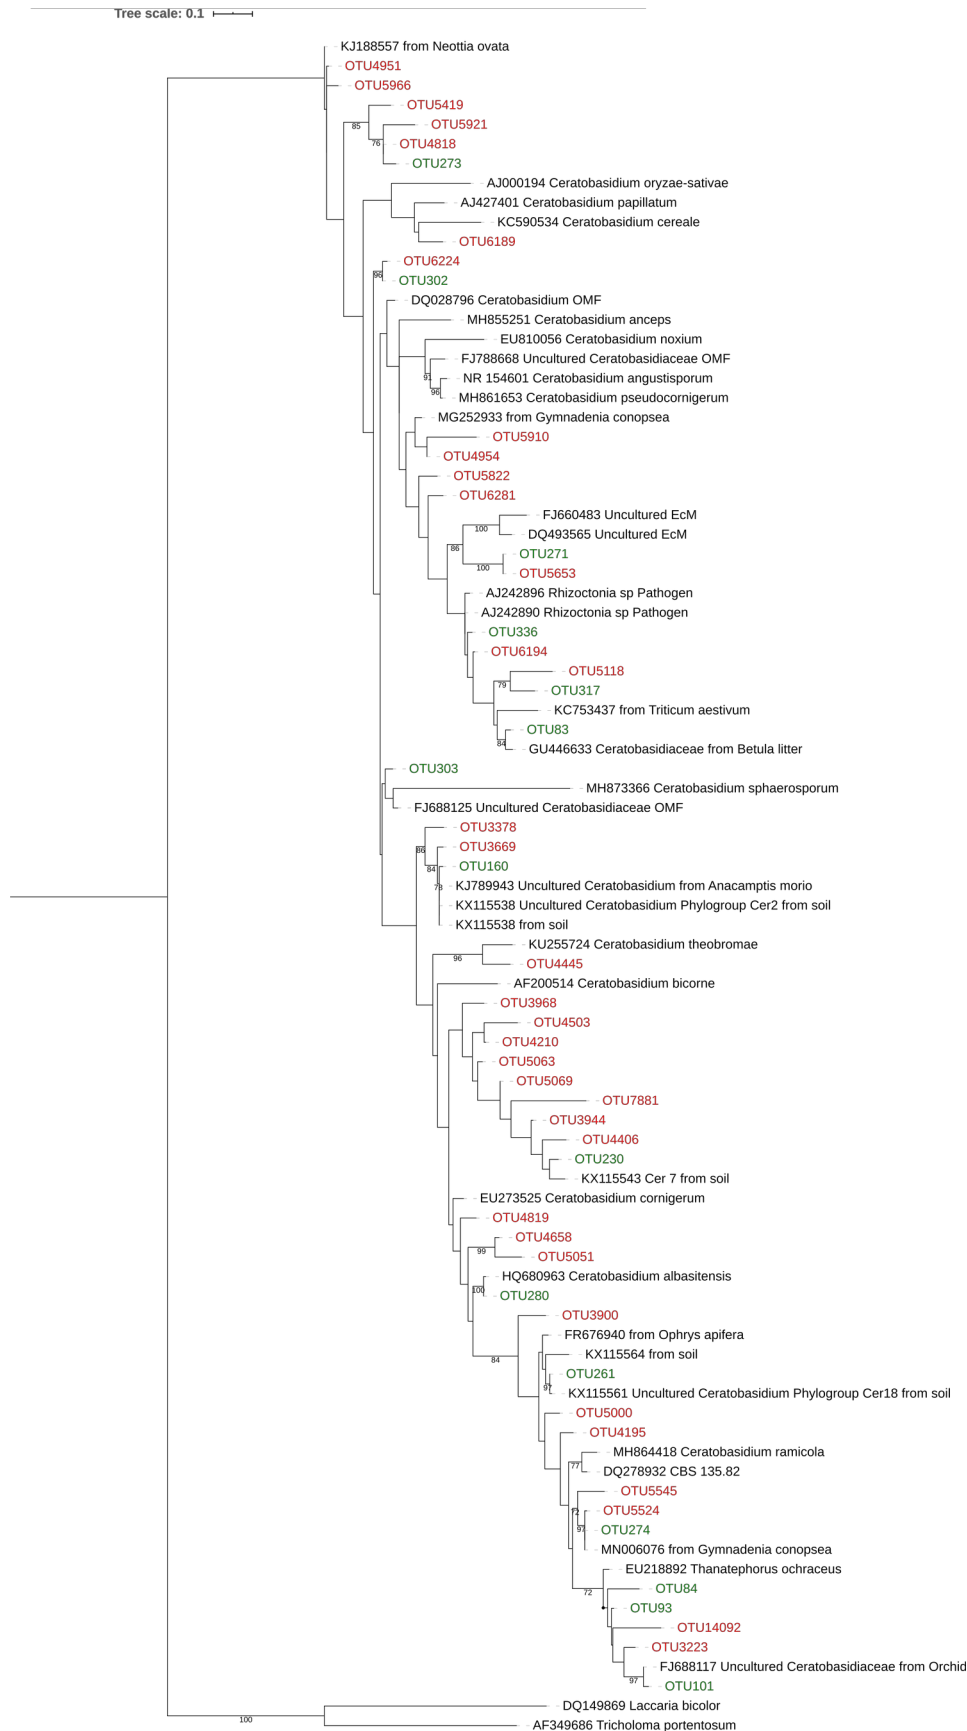

**Figure S1.** Maximum likelihood tree obtained from the ITS2 sequence alignment of ceratobasidioid fungi. *Tricholoma portentosum* and *Laccaria bicolor* were used as outgroup taxa. Bootstrap support values above 70% (1000 maximum likelihood replicates) are reported. OTUs found in soil samples are indicated in red while in green those from orchid roots analyzed in this study.

a)

Tree scale: 0.1

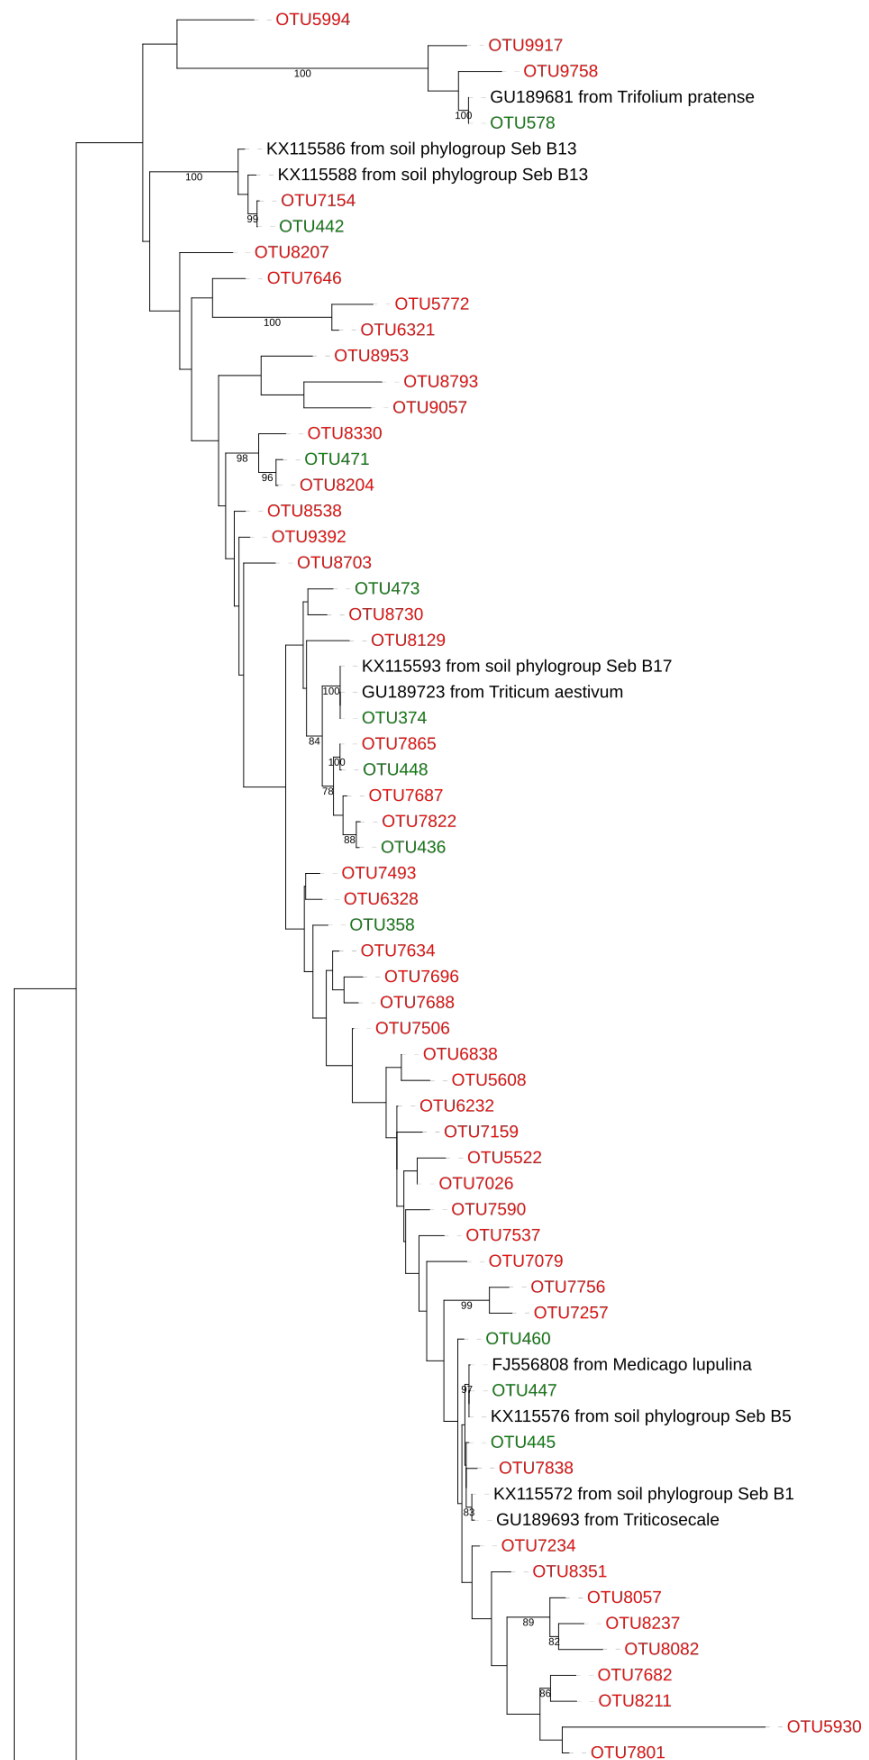

**b)**

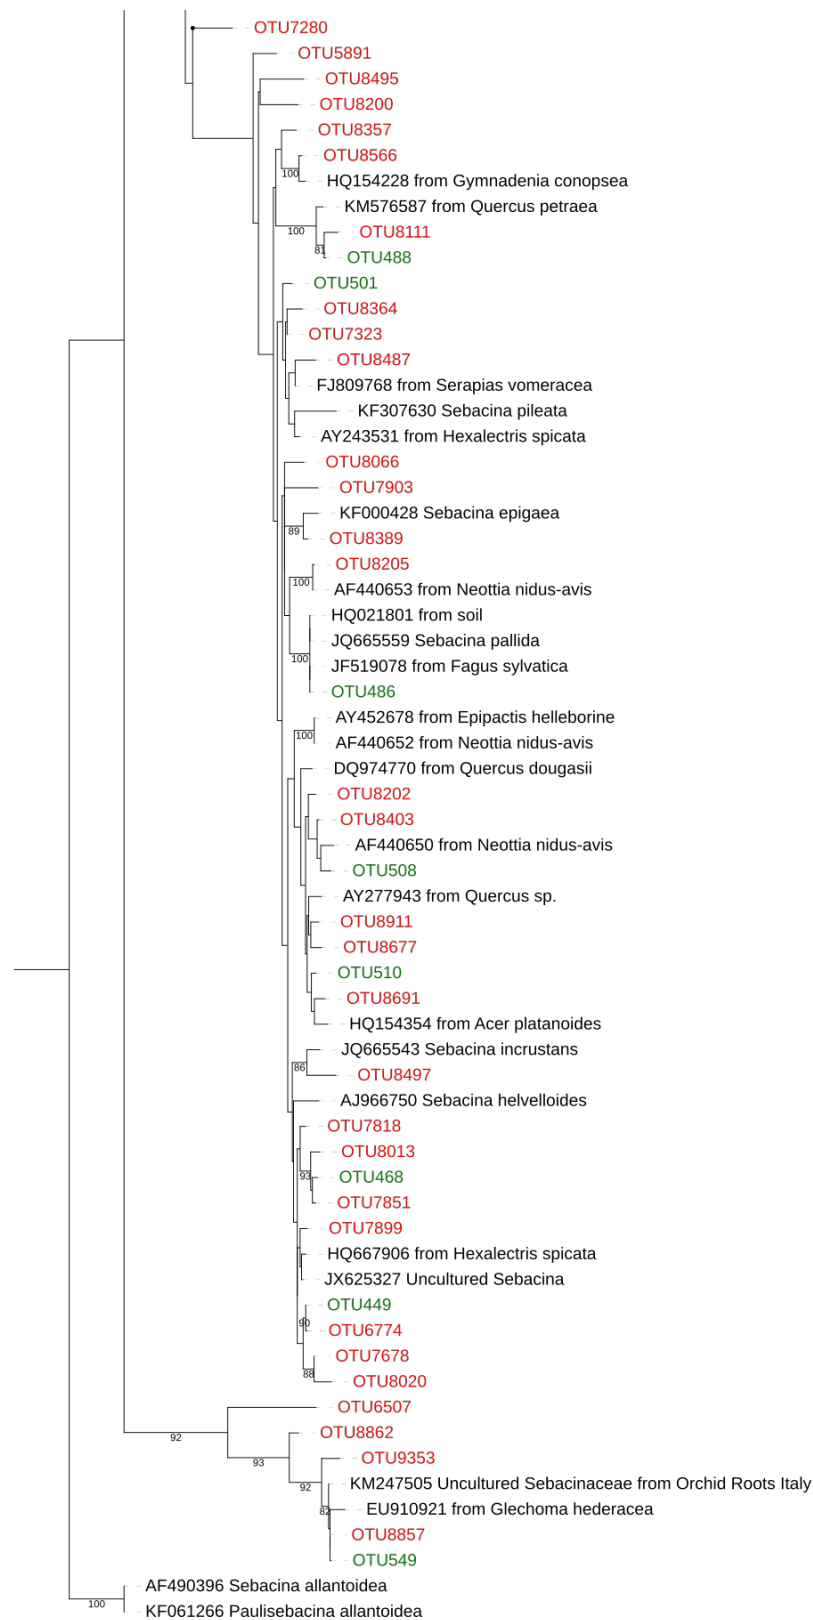

**Figure S2.** Maximum likelihood tree obtained from the ITS2 sequence alignment of fungi assigned to a) serendipitoid and b) sebacinoid (Sebacinales). *Paulisebacina allantoidea* was used as an outgroup taxon. Bootstrap support values above 70% (1000 maximum likelihood replicates) are reported. OTUs found in soil samples are indicated in red while in green those from orchid roots analyzed in this study
